# Supplementary material
Source: PubMed Central journal article supplement (PMC4432280)

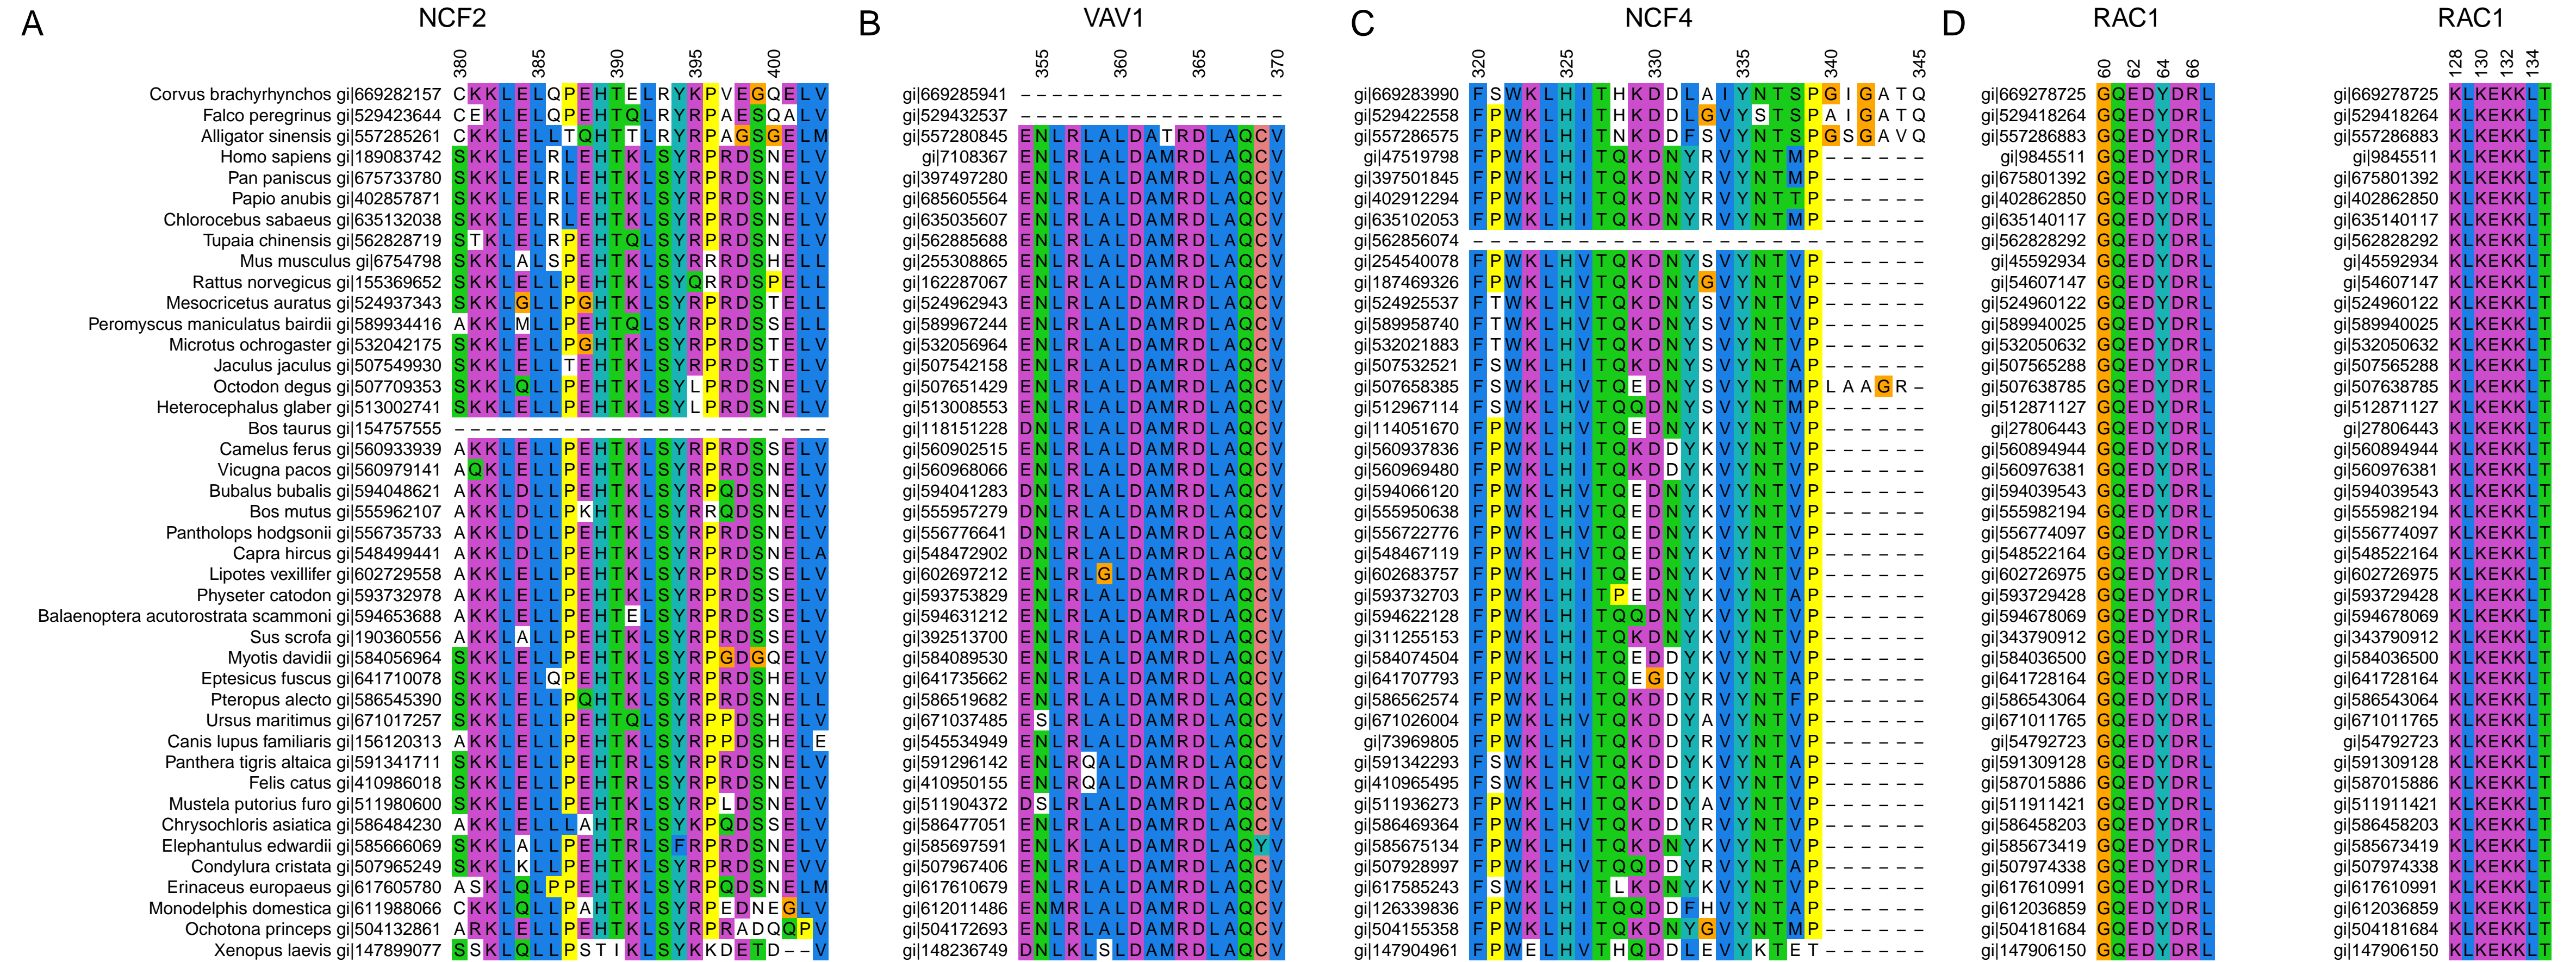

Supplement: supp_M115.639021_jbc.M115.639021-1.pdf [file supp_M115.639021_jbc.M115.639021-1.pdf]
